# Supplementary material for: Disparities in the Occurrence of Late Effects following Treatment among Adolescent and Young Adult Melanoma Survivors
Source: Oxford University Press journal article supplement (doi:10.1158/1055-9965.epi-20-0427), 2020-08-20
Supplement: 10559965epi200427-sup-239647_3_supp_6460655_qj8jbc.docx [file 10559965epi200427-sup-239647_3_supp_6460655_qj8jbc.docx]

**Supplemental Table S2: Sites of first primary and subsequent primary melanomas**

| **Site of first primary melanoma** | **Site of subsequent primary melanoma** | **Percentage (%)** |
| --- | --- | --- |
| Face | Face | 1.7 |
| Face | Lower limb and hip | 1.4 |
| Face | Other | 0.3 |
| Face | Scalp and neck | 0.3 |
| Face | Skin of trunk | 2.0 |
| Face | Upper limb and shoulder | 0.7 |
| Lower limb and hip | Face | 0.3 |
| Lower limb and hip | Lower limb and hip | 12.2 |
| Lower limb and hip | Other | 0.3 |
| Lower limb and hip | Scalp and neck | 0.3 |
| Lower limb and hip | Skin of trunk | 6.4 |
| Lower limb and hip | Upper limb and shoulder | 6.1 |
| Other | Lower limb and hip | 0.3 |
| Other | Upper limb and shoulder | 0.3 |
| Scalp and neck | Face | 2.7 |
| Scalp and neck | Lower limb and hip | 0.3 |
| Scalp and neck | Other | 0.3 |
| Scalp and neck | Scalp and neck | 1.4 |
| Scalp and neck | Skin of trunk | 1.1 |
| Scalp and neck | Upper limb and shoulder | 0.7 |
| Skin of trunk | Face | 3.0 |
| Skin of trunk | Lower limb and hip | 10.5 |
| Skin of trunk | Other | 0.3 |
| Skin of trunk | Scalp and neck | 1.4 |
| Skin of trunk | Skin of trunk | 17.6 |
| Skin of trunk | Upper limb and shoulder | 7.4 |
| Upper limb and shoulder | Face | 2.4 |
| Upper limb and shoulder | Lower limb and hip | 4.1 |
| Upper limb and shoulder | Other | 0.7 |
| Upper limb and shoulder | Scalp and neck | 1.4 |
| Upper limb and shoulder | Skin of trunk | 7.1 |
| Upper limb and shoulder | Upper limb and shoulder | 5.1 |
