# Supplementary material for: Disparities in the Occurrence of Late Effects following Treatment among Adolescent and Young Adult Melanoma Survivors
Source: Oxford University Press journal article supplement (doi:10.1158/1055-9965.epi-20-0427), 2020-08-20
Supplement: 10559965epi200427-sup-239647_3_supp_6460657_q383bc.docx [file 10559965epi200427-sup-239647_3_supp_6460657_q383bc.docx]

| **Supplemental Table S1: ICD 9 codes defining the medical conditions** | |
| --- | --- |
|  |  |
| **Medical conditions** | **ICD 9 codes** |
| **Hematologic** |  |
| Leukopenia | 288.0 - 288.5 |
| Anemia | 280 - 285 |
| Thrombocytopenia | 287.3 - 287.5 |
| Major bleeding | 360.43, 423.0, 430., 431., 432.0, 432.1, 432.9, 456.0, 456.20, 459.0, 530.7, 530.82, 531.00, 531.01, 531.20, 531.21, 531.40, 531.41, 531.60, 531.61, 532.00, 532.01, 532.20, 532.21, 532.40, 532.41, 532.60, 532.61, 533.00, 533.01, 533.20, 533.21, 533.40, 533.41, 533.60, 533.61, 534.00, 534.01, 534.20, 534.21, 534.40, 534.41, 534.60, 534.61, 535.01, 535.11, 535.21, 535.31, 535.41, 535.51, 535.61, 537.83, 562.02, 562.03, 562.12, 562.13, 568.81, 569.3, 569.85, 578.0, 578.1, 578.9, 593.81, 784.8, 786.3, 852.0, 852.2, 852.4, 853.0, 719.1 |
| **Lymphedema** | 457.0 - 457.1 |
| **Endocrine** |  |
| Hypothyroidism, Ovarian/testicular dysfunction | 244, 256, 257 |
| **Metabolic** |  |
| Diabetes | 249 - 250 |
| **Metabolic** |  |
| Hypertensive disease | 401 - 405 |
| Ischemic heart disease | 410 - 414 |
| Other heart disease | 420 - 429 |
| stroke | 430 - 435 |
| Procedure code | 37.51, V42.1, V45.81, V45.82, 00.66, 36, 00.61, 00.62, 00.63, 00.64, 00.65, 39.74 |
| **Autoimmune** |  |
| AIDs of the Endocrine System | 242.0, 245.2 |
| Specific | 279 |
| Hematologic | 281.0, 283.0, 284.01, 284.09, 284.81, 284.9, 286.53, 286.7, 287.31, 287.32 |
| Neurologic | 340, 341.0, 357.81, 358.0, 358.1, 364.3, 377.3 |
| Vasculitides | 446.5, 437.4, 446.0, 446.21, 446.4, 446.7 |
| Gastrointestinal | 555, 571.42, 571.6, 579.0, 580, 582 |
| AID of Skin, Bone, and Joints | 694.4, 694.5, 696, 704.01, 709.01, 714, 720 |
| Diffuse Connective Tissue Diseases (including sarcoidosis) | 321.4, 135, 710, 725, 729 |
| Additional autoimmune | 255, 443.0, 695.1 |
| Venous thromboembolism |  |
| High Probability | 453.2, 453.8, 673.2, 415.11, 415.13, 415.19, 451.11, 451.19, 451.81, 453.40, 453.41, 453.42, 671.31, 671.33, 671.42, 671.44, 997.2, 997.3, 453.9, 453.89 |
| Moderate Probability | 415.11, 415.13, 415.19, 673.2, 453.41, 453.42, 671.31, 671.33, 671.42, 671.44 |
| **Infection/sepsis** |  |
| Infection (primary diagnosis) | 001 - 139, 460 - 466, 480 - 488, 680 - 686, 320, 321, 324, 382, 390, 391, 392, 420, 421, 422, 475, 490, 510, 513, 540, 566, 567, 572, 575, 590, 597, 604, 647, 670, 675, 730, 323.0-323.4, 357.0, 372.0, 380.1, 519.2, 523.0, 527.3, 528.3, 576.1, 595.0, 598.0, 599.0, 601.0, 601.2, 614.0, 614.3, 614.5, 616.0, 616.1, 616.3, 616.4, 646.6, 728.0, 730.9, 695.5, 790.7, 790.8, 996.6, 998.5, 360.00, 383.01, 383.02, 384.01, 478.21, 478.22, 478.24, 711.00, 711.90, 728.86 |
| Sepsis |  |
| Streptococcal septicemia | 038.0 |
| Staphylococcal | 038.1 |
| Other gram negative | 038.4 |
| Other specified | 020.2, 022.3, 036.2, 038.2, 038.3, 054.5, 038.8, 038.9, 449, 790.7 |
| Systemic inflammatory response syndrome (SIRS) | 995.90, 995.91, 995.92 |
